# Supplementary material
Source: PubMed Central journal article supplement (PMC10016900)

**Figure S3****A** *myeloid leukocyte activation*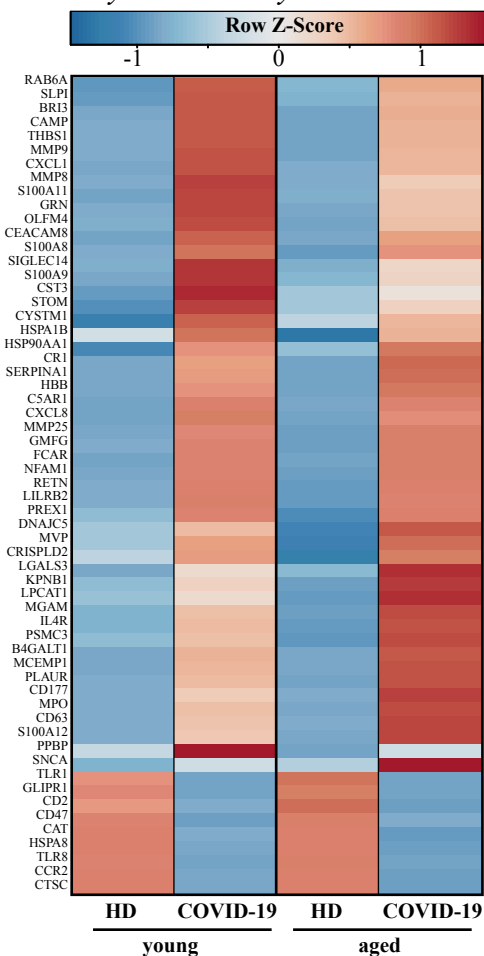**B** *lymphocyte activation*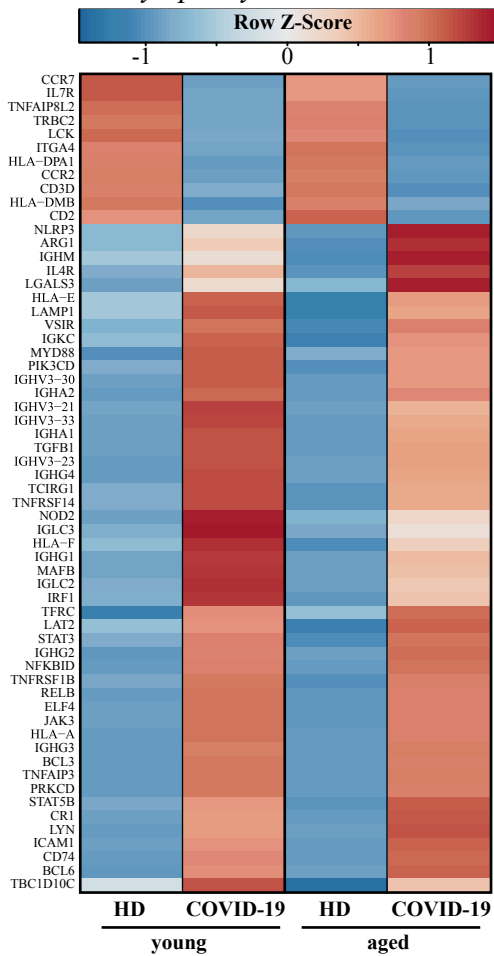**C** *young unique GO term genes*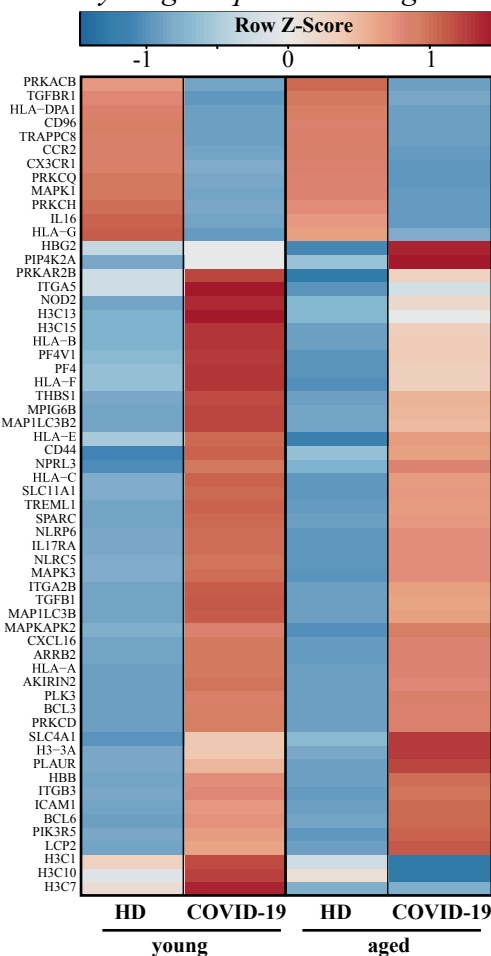**D** *aged unique GO term genes*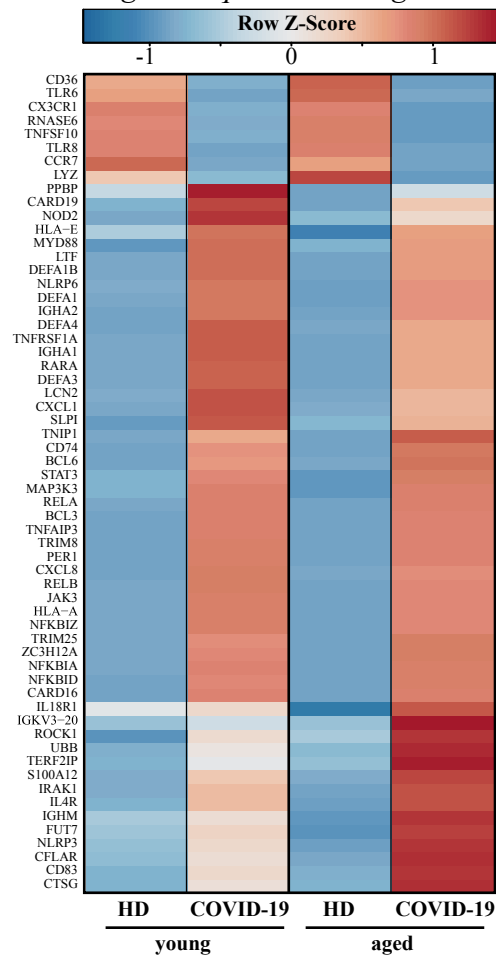

Supplement: jlb11030-sup-0003-figures3.pdf [file jlb11030-sup-0003-figures3.pdf]
