# Supplementary material
Source: PubMed Central journal article supplement (PMC10016900)

Figure S1

A

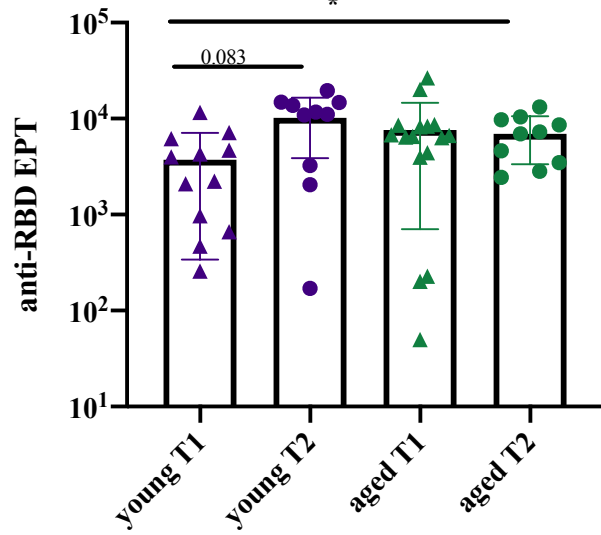

B

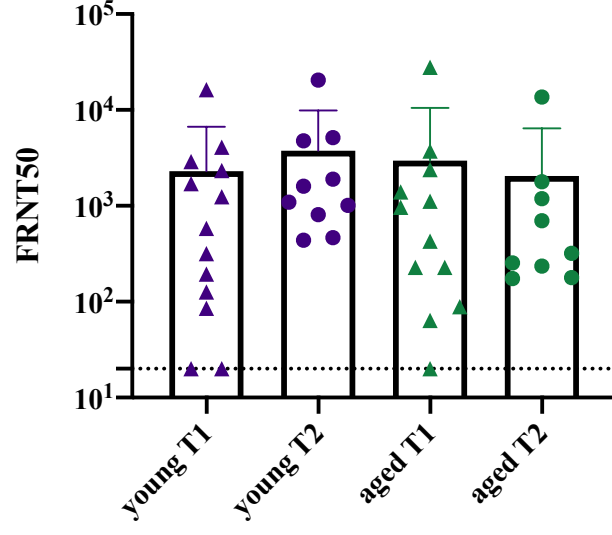

C

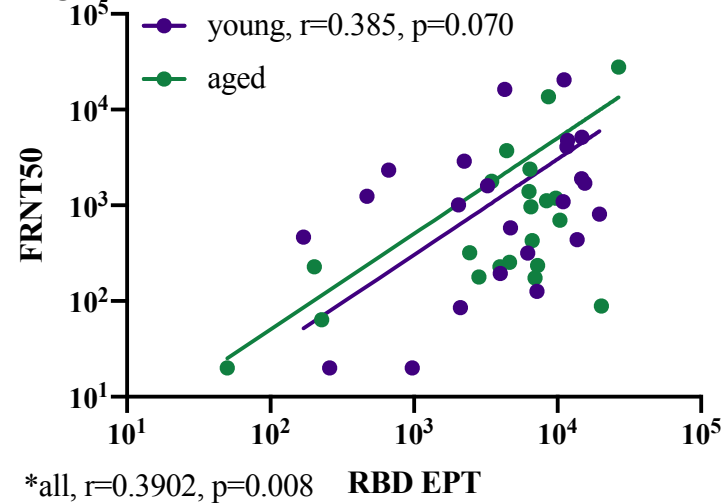

D

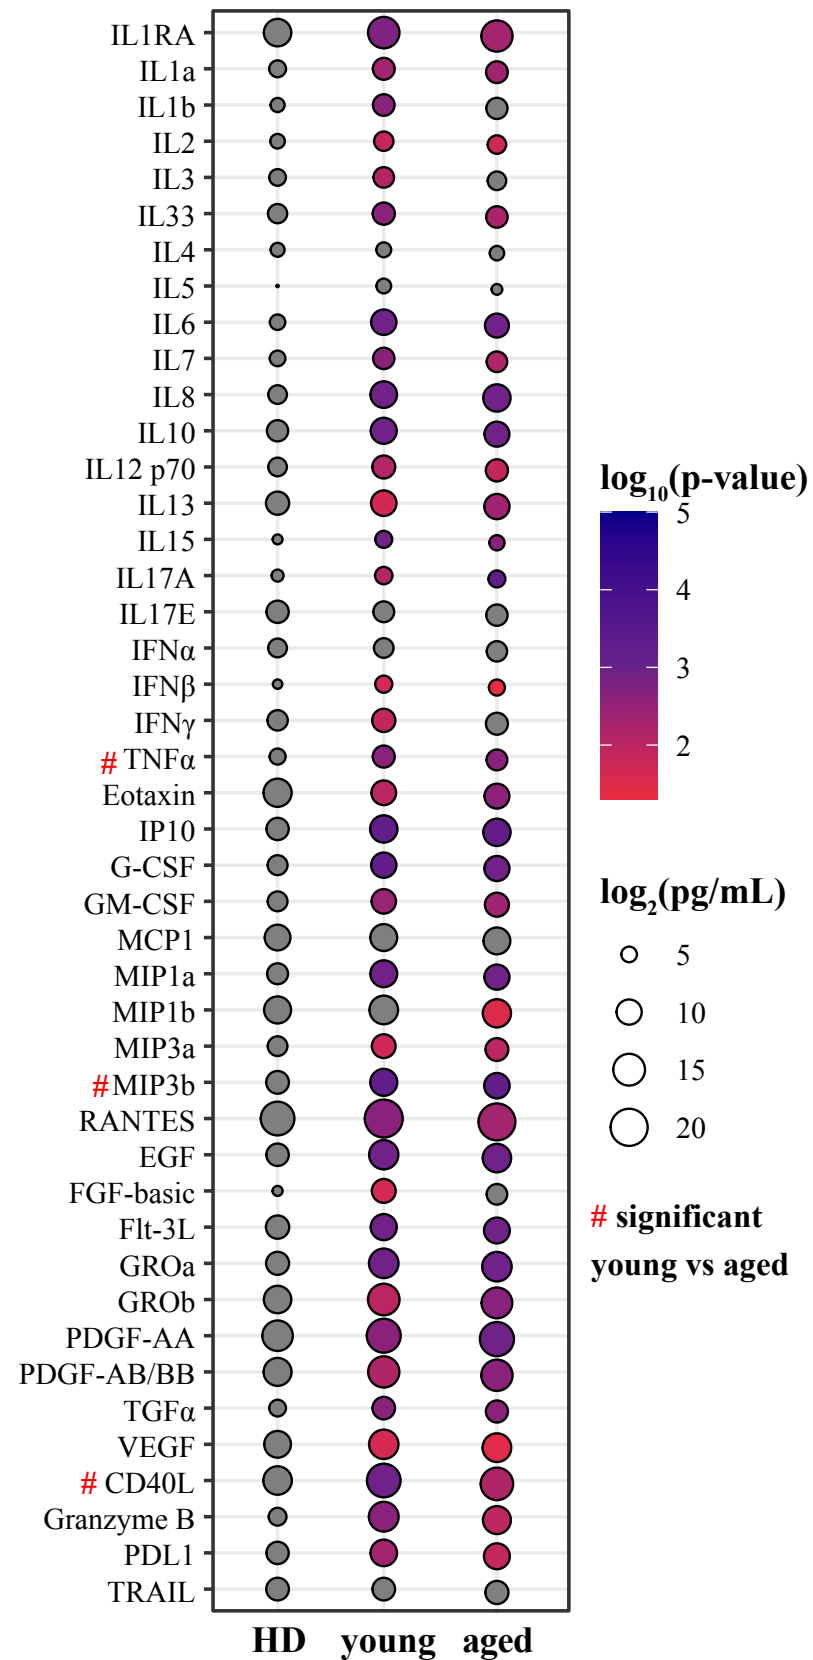

E

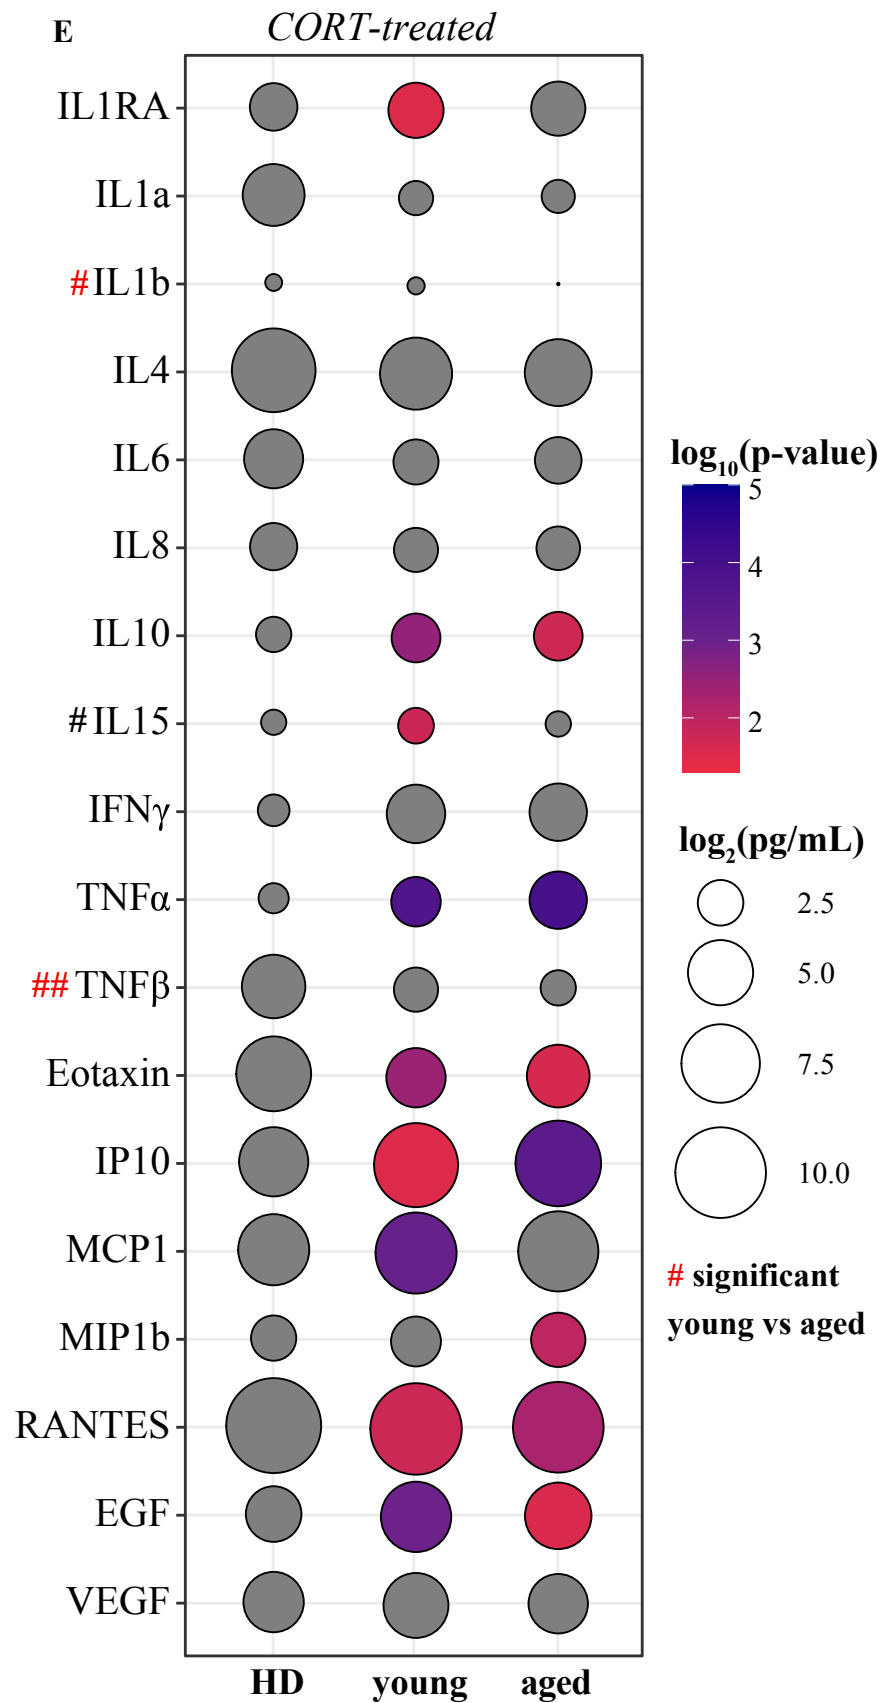

Supplement: jlb11030-sup-0001-figures1.pdf [file jlb11030-sup-0001-figures1.pdf]

**Figure S2****A**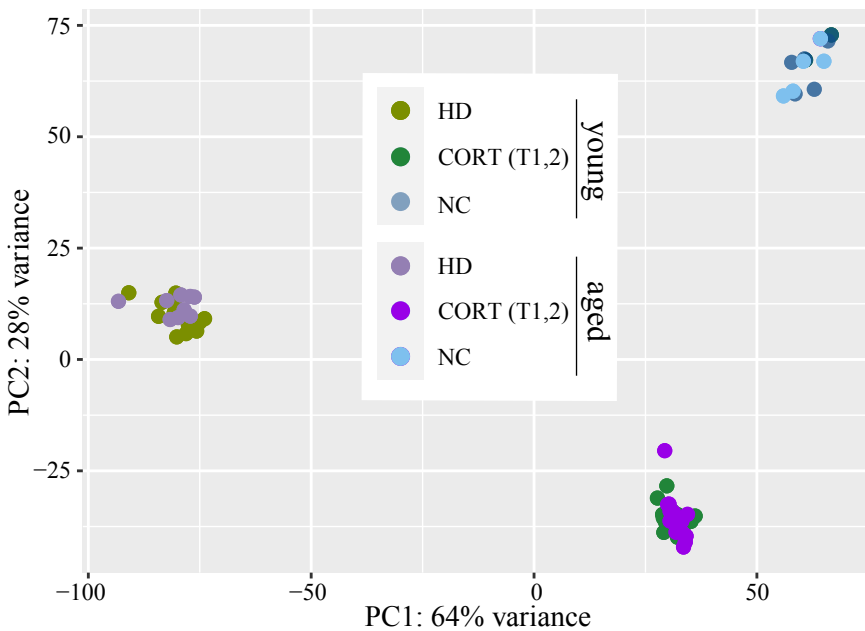**B** *myeloid leukocyte activation, neutrophil degranulation*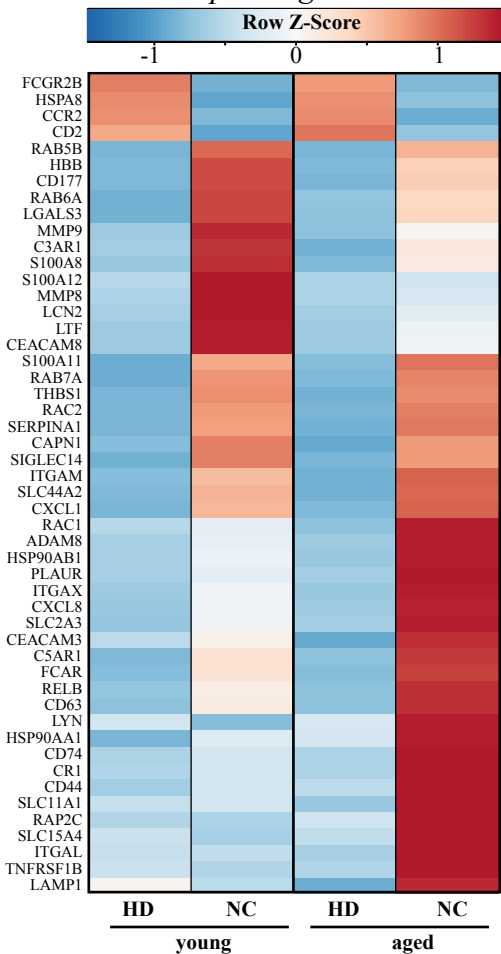**C** *lymphocyte activation*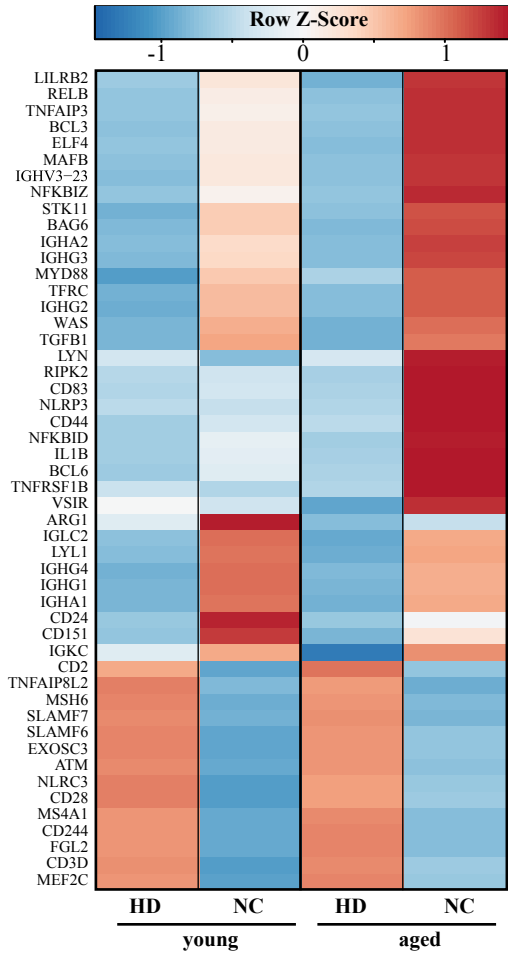

Supplement: jlb11030-sup-0002-figures2.pdf [file jlb11030-sup-0002-figures2.pdf]

Figure S4

A

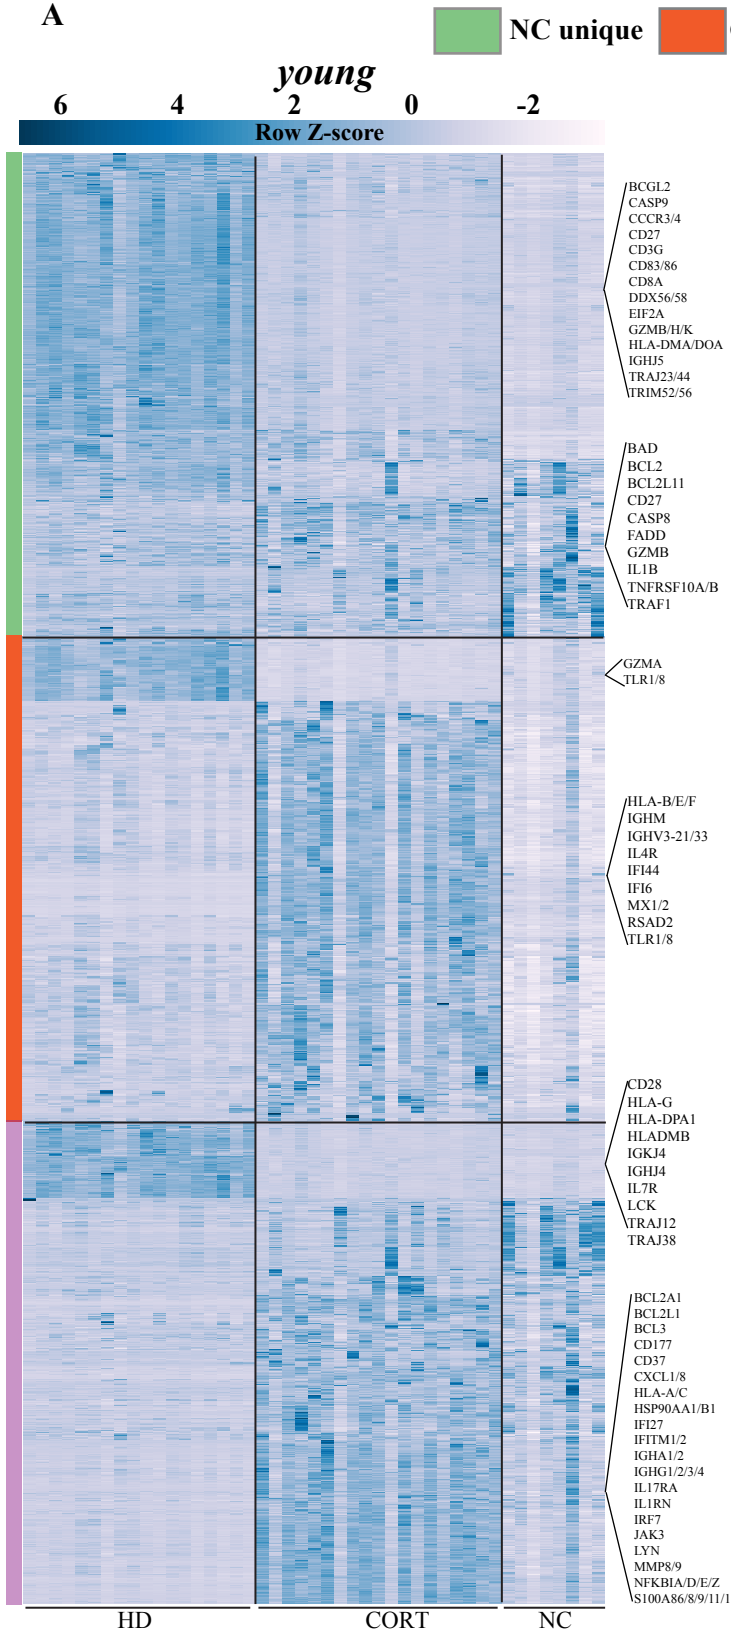

B

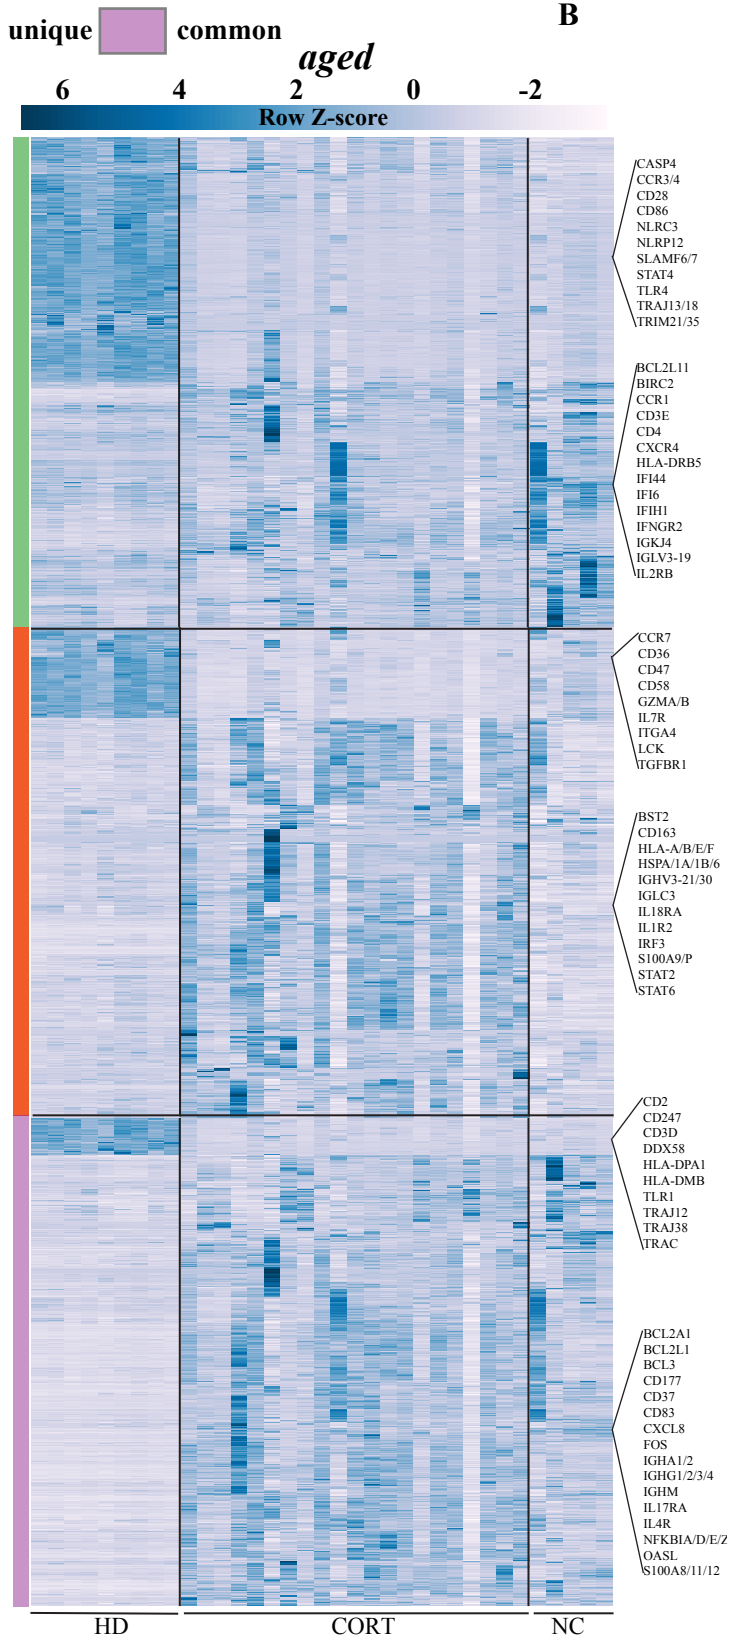

Supplement: jlb11030-sup-0004-figures4.pdf [file jlb11030-sup-0004-figures4.pdf]

**Figure S5**

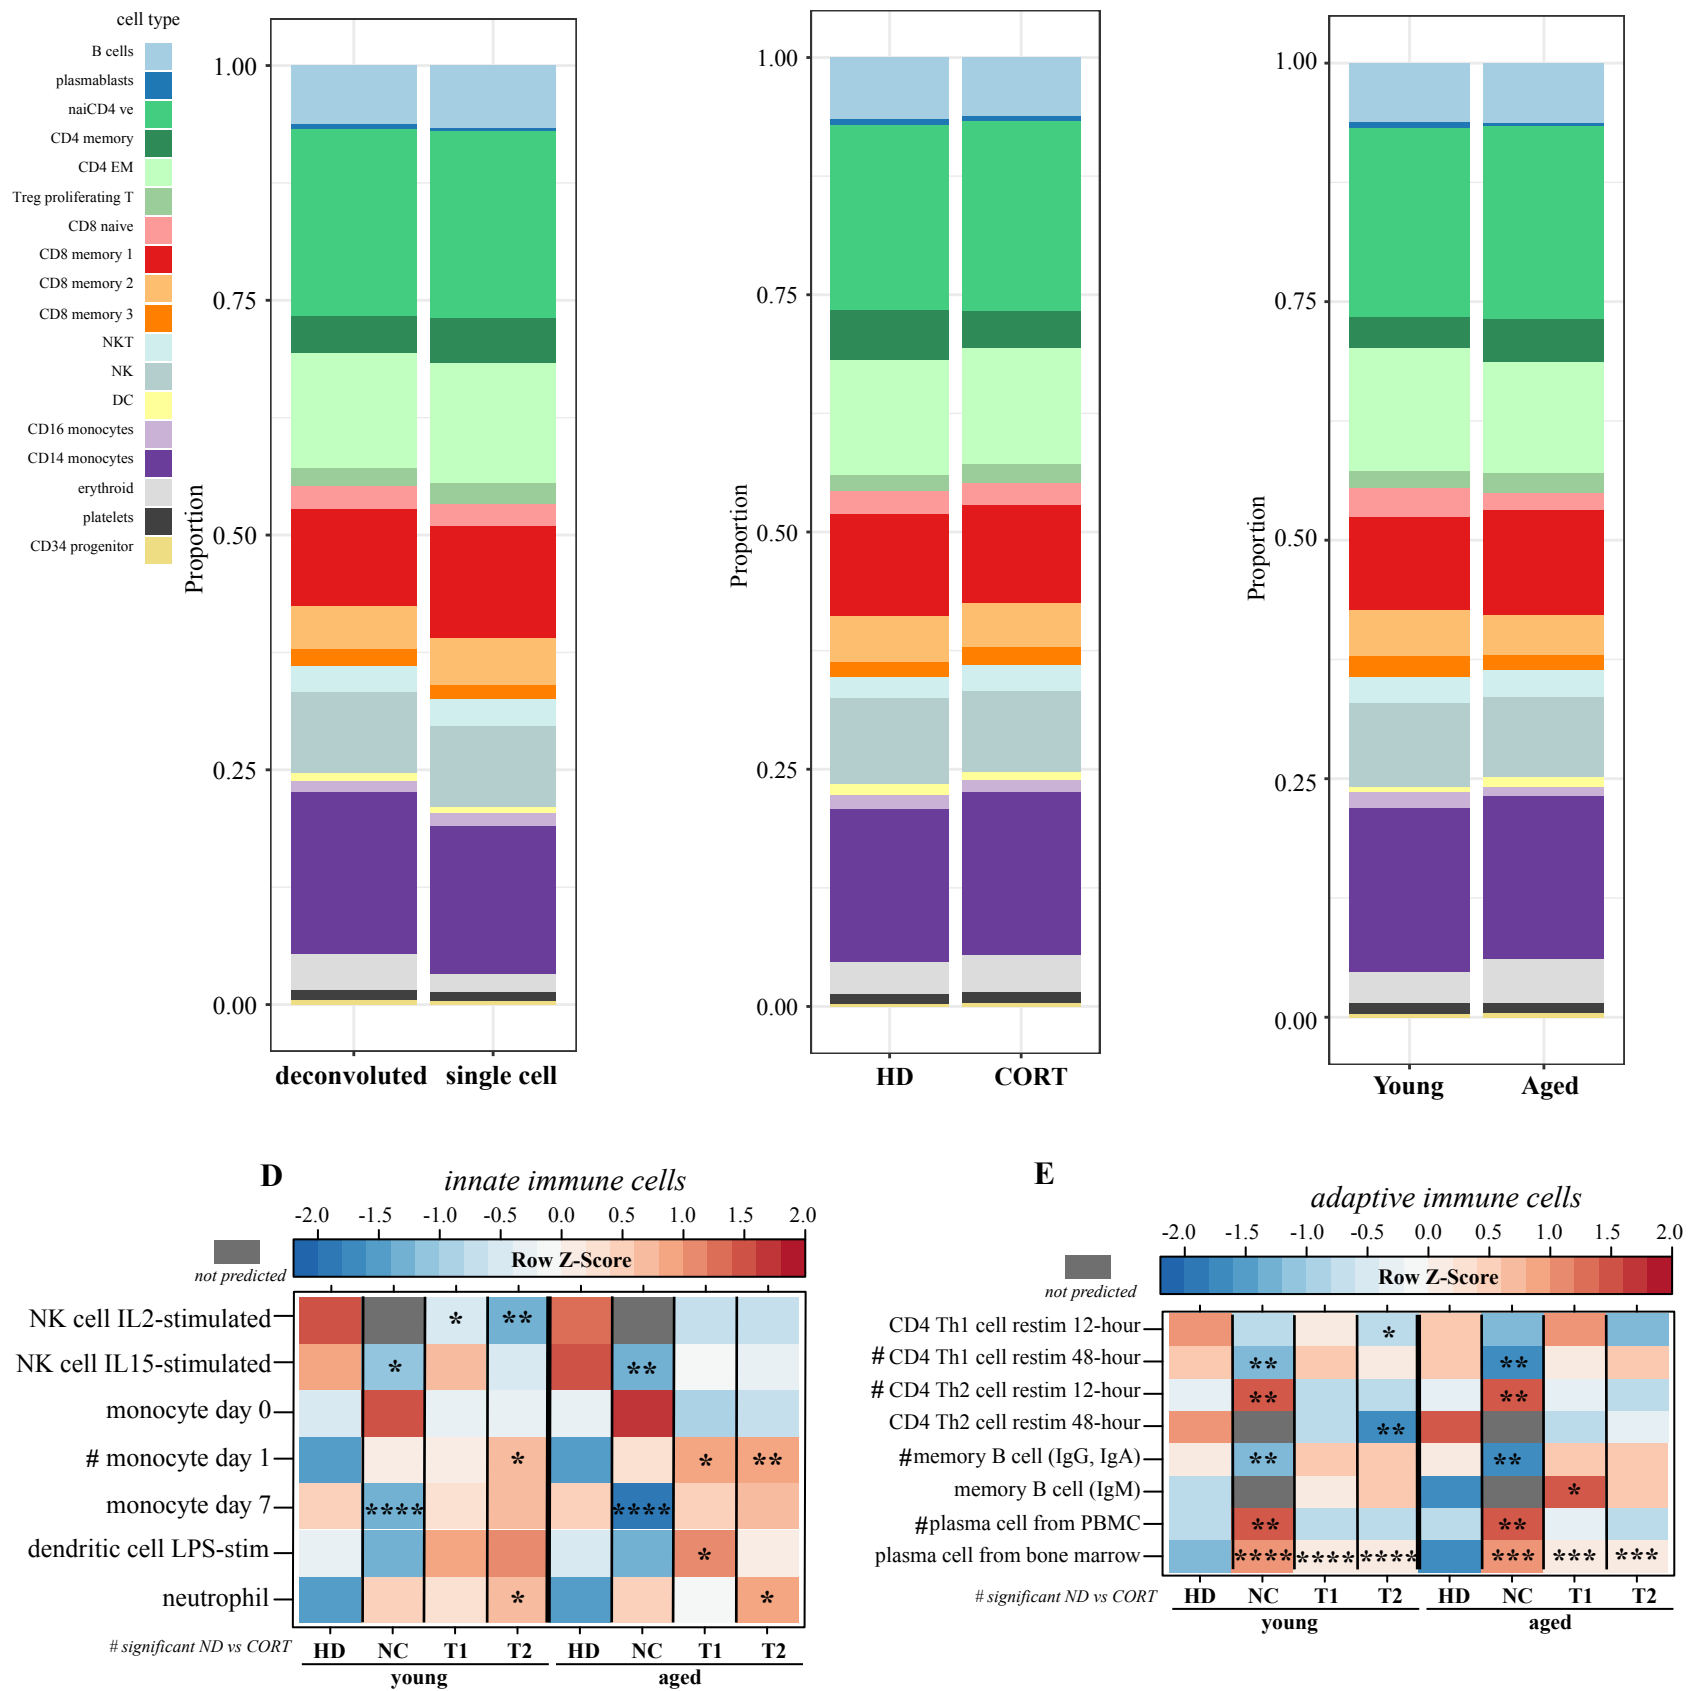

Supplement: jlb11030-sup-0005-figures5.pdf [file jlb11030-sup-0005-figures5.pdf]
